# Supplementary material
Source: MDPI journal article supplement (https://www.mdpi.com/2073-4441/10/8/1055)
Supplement: s1 [file s1]

# Supplementary Materials

## Small Microplastic Sampling in Water: Development of an Encapsulated Filtration Device

Robin Lenz and Matthias Labrenz \*

Leibniz Institute for Baltic Sea Research Warnemünde (IOW), Seestraße 15, 18119 Rostock, Germany; robin.lenz@io-warnemuende.de  
\* Correspondence: matthias.labrenz@io-warnemuende.de; Tel.: +49-381-519-7378

**Table S1.** Locations, dates and sample volumes from a first sampling campaign in the river system Warnow (Mecklenburg-Vorpommern, Germany).

| Sample Station no. | Station name               | Date     | GPS Lat   | GPS Lon   | Total volume [L] | Comments                                                                |
|--------------------|----------------------------|----------|-----------|-----------|------------------|-------------------------------------------------------------------------|
| 1.1                | Kessin #1                  | 19-03-18 | 54.064148 | 12.171031 | 203              | Site type: major river in suburban area                                 |
| 2                  | Rostock Kösterbeck         | 20-03-18 | 54.055778 | 12.187067 | 117              | Site type: small tributary in rural area                                |
| 3                  | Reez Zarnow                | 23-03-18 | 54.001883 | 12.152922 | 296              | Site type: small tributary in village settlement area                   |
| 4                  | Schwaan Warnow             | 21-03-18 | 53.939531 | 12.110214 | 255              | Site type: major river in suburban area                                 |
| 5                  | Schwaan Beke               | 23-03-18 | 53.941328 | 12.104833 | 179              | Site type: major tributary in suburban area                             |
| 6                  | Bützow Warnow              | 26-03-18 | 53.837786 | 11.976086 | 273              | Site type: major river in suburban area                                 |
| 7                  | Bützow Pre-Nebel           | 27-03-18 | 53.838889 | 12.005242 | 682              | Site type: major tributary in suburban area                             |
| 8                  | Sternberg Warnow           | 27-03-18 | 53.744897 | 11.832483 | 336              | Site type: major river in rural area                                    |
| 9                  | Sternberger Burg Mildenitz | 27-03-18 | 53.735878 | 11.836956 | 320              | Site type: major tributary in small village settlement area             |
| WWTP 1             | WWTP Sternberger Burg      | 06-04-18 | 53.736104 | 11.836658 | 1011             | Site type: waste water treatment plant outlet                           |
| WWTP 2             | WWTP Güstrow-Parum         | 17-04-18 | 53.815165 | 12.122219 | 590              | Site type: waste water treatment plant outlet                           |
| WWTP 3             | WWTP Warnow                | 02-05-18 | 53.788994 | 11.879514 | 169              | Sampling ended prematurely due to flow break down after air entrainment |
| 1.2                | Kessin #2                  | 04-04-18 | 54.064148 | 12.171031 | 277              | Site type: major river in suburban area                                 |
| 1.3                | Kessin #3                  | 17-04-18 | 54.064148 | 12.171031 | 280              | Site type: major river in suburban area                                 |
| 1.4                | Kessin #4                  | 02-05-18 | 54.064148 | 12.171031 | 225              | Site type: major river in suburban area                                 |
